# Supplementary material
Source: MDPI journal article supplement (https://www.mdpi.com/2071-1050/13/3/1424)
Supplement: s1 [file s1]

# Supplementary Materials

## Multidimensional Aspects of Sustainable Biofuel Feedstock Production

Anna Raschke <sup>a</sup>, J. Sebastian Hernandez-Suarez <sup>a</sup>, A. Pouyan Nejadhashemi <sup>a,\*</sup>, and Kalyanmoy Deb <sup>b</sup>

<sup>a</sup>Department of Biosystems and Agricultural Engineering, Michigan State University, East Lansing, MI 48824, USA

<sup>b</sup>Department of Electrical and Computer Engineering, Michigan State University, East Lansing, MI, United States.

\* Corresponding Author. Tel.: (517) 432-7653. Email address: pouyan@msu.edu (A. Pouyan

Nejadhashemi)

Table S1. Calibration and validation performance evaluation of SWAT simulated data against USGS station 04155500 observations [37, 38, 39]

| Metric     | Optimal | Calibration (2003-2008) | Validation (2009-2014) | Overall (2003-2014) |
|------------|---------|-------------------------|------------------------|---------------------|
| NSE        | 1.0     | 0.69                    | 0.75                   | 0.72                |
| KGE        | 1.0     | 0.84                    | 0.86                   | 0.86                |
| KGE'       | 1.0     | 0.81                    | 0.84                   | 0.86                |
| RSR        | 0.0     | 0.56                    | 0.50                   | 0.52                |
| d          | 1.0     | 0.92                    | 0.93                   | 0.93                |
| $R^2$      | 1.0     | 0.74                    | 0.76                   | 0.75                |
| PBIAS (%)  | 0.0     | 4.56                    | -5.16                  | -0.48               |
| RMSE (cms) | 0.0     | 5.37                    | 5.62                   | 5.49                |

Table S2. Example life cycle analysis calculation of soybean crop

| Soybeans   |                                     | Quantity                             | Unit              | Net carbon<br>(kgCO <sub>2</sub> e/ha) |      |
|------------|-------------------------------------|--------------------------------------|-------------------|----------------------------------------|------|
| SOM farm   | % SOM                               | 1.75                                 | %                 |                                        |      |
|            | SOM per acre                        | 78000                                | Kg/ha             |                                        |      |
|            | SOM maintenance cost                | 2.3                                  | %                 |                                        |      |
|            | SOM lost per year                   | 1800                                 | Kg/ha/yr          | -3200                                  |      |
| Biomass    | Soybean yield                       | 2.7                                  | Tonne             |                                        |      |
|            | Biofuel energy component            | 600                                  | L/ha              |                                        |      |
|            | Harvest efficiency                  | 40                                   | %                 |                                        |      |
|            | Shoot-to-root ratio                 | 5.2                                  |                   |                                        |      |
|            | Total above-ground biomass          | 7300                                 | Kg/ha             |                                        |      |
|            |                                     | Above-ground residue                 | 4400              | Kg/ha                                  |      |
|            |                                     | Belowground residue                  | 1300              | Kg/ha                                  |      |
|            |                                     | Total residue                        | 5700              | Kg/ha                                  |      |
|            |                                     | Residue contribution to SOM          | 1100              | Kg/ha                                  | 2100 |
|            |                                     | No-till or perennial crop SOM credit | 0.00              | SOM increase                           |      |
| Fertilizer | Seeds per acre                      | 320,000                              | Seeds/ha          | -21                                    |      |
|            | N (Urea)                            | 0                                    | Kg/ha             | 0                                      |      |
|            | P <sub>2</sub> O <sub>5</sub>       | 38                                   | Kg/ha             | -21                                    |      |
|            | K <sub>2</sub> O                    | 67                                   | Kg/ha             | -29                                    |      |
|            | Lime                                | 0                                    | Tonne/ha          | 0                                      |      |
| Pesticides | Glyphosate Amine                    | 0.9                                  | Kg/ha             | -41                                    |      |
| Energy     | Drying                              | 0                                    | %pts/tonne to dry | 0                                      |      |
|            | Fuel, oil, lube                     | 150                                  | L/ha              | -390                                   |      |
|            | Water                               | 0                                    | Hai               | 0                                      |      |
|            | Labor                               | 2.5                                  | Hr/ha             | -11                                    |      |
| Total      | Carbon saving from displaced diesel |                                      |                   | 1600                                   |      |
|            | Carbon sequestered as SOM           |                                      |                   | 2100                                   |      |
|            | Carbon from inputs                  |                                      |                   | -500                                   |      |
|            | Net carbon sequestered and energy   |                                      |                   | 3200                                   |      |

Table S3. Example economic analysis of soybean production USD per planted hectare in Northern Crescent U.S. [21]

| Economic Elements                   | Year       |            |            |            |            |            |          |          |          |          |           |           |
|-------------------------------------|------------|------------|------------|------------|------------|------------|----------|----------|----------|----------|-----------|-----------|
|                                     | 2014       | 2013       | 2012       | 2011       | 2010       | 2009       | 2008     | 2007     | 2006     | 2005     | 2004      | 2003      |
| <b>Gross value soybeans</b>         | \$1,222.65 | \$1,352.77 | \$1,563.88 | \$1,413.43 | \$1,155.96 | \$1,027.03 | \$950.46 | \$851.80 | \$622.64 | \$613.18 | \$527.44  | \$480.37  |
| <b>Operating costs</b>              |            |            |            |            |            |            |          |          |          |          |           |           |
| Seed                                | \$155.59   | \$153.98   | \$146.25   | \$147.26   | \$153.78   | \$143.11   | \$114.98 | \$103.12 | \$85.63  | \$78.27  | \$73.01   | \$67.83   |
| Fertilizer                          | \$122.19   | \$127.18   | \$129.68   | \$85.14    | \$64.27    | \$83.81    | \$89.17  | \$54.09  | \$48.46  | \$44.09  | \$35.27   | \$32.11   |
| Chemicals                           | \$55.65    | \$54.64    | \$52.61    | \$38.98    | \$39.79    | \$40.34    | \$36.56  | \$34.93  | \$34.38  | \$33.69  | \$41.32   | \$41.89   |
| Custom services                     | \$31.02    | \$30.16    | \$29.02    | \$23.81    | \$23.37    | \$23.09    | \$21.19  | \$21.19  | \$20.18  | \$24.23  | \$23.12   | \$23.14   |
| Fuel, lube, and electricity         | \$42.81    | \$42.81    | \$43.25    | \$46.58    | \$36.53    | \$29.34    | \$44.26  | \$33.96  | \$30.75  | \$37.30  | \$26.50   | \$25.44   |
| Repairs                             | \$48.49    | \$47.57    | \$47.10    | \$29.79    | \$28.70    | \$28.16    | \$27.61  | \$26.73  | \$26.01  | \$31.67  | \$29.22   | \$27.52   |
| Interest on operating capital       | \$0.15     | \$0.20     | \$0.30     | \$0.20     | \$0.35     | \$0.49     | \$7.48   | \$6.15   | \$5.83   | \$4.20   | \$1.80    | \$1.16    |
| <b>Allocated overhead</b>           |            |            |            |            |            |            |          |          |          |          |           |           |
| Hired labor                         | \$4.22     | \$4.15     | \$4.03     | \$3.24     | \$3.19     | \$3.16     | \$3.09   | \$2.99   | \$2.89   | \$8.15   | \$8.10    | \$8.05    |
| Opportunity cost unpaid labor       | \$44.56    | \$43.74    | \$42.51    | \$46.09    | \$45.62    | \$45.13    | \$44.16  | \$42.73  | \$41.27  | \$54.96  | \$53.52   | \$53.75   |
| Capital recovery machine and equip. | \$181.42   | \$174.95   | \$170.08   | \$175.44   | \$165.37   | \$159.61   | \$150.27 | \$137.33 | \$130.86 | \$137.83 | \$127.11  | \$119.65  |
| Opportunity cost of land            | \$311.15   | \$300.11   | \$275.82   | \$245.49   | \$224.45   | \$218.35   | \$188.58 | \$170.92 | \$175.35 | \$177.74 | \$176.28  | \$171.44  |
| Taxes and insurance                 | \$25.71    | \$25.22    | \$24.72    | \$30.95    | \$28.85    | \$33.17    | \$29.57  | \$26.63  | \$24.68  | \$19.14  | \$18.40   | \$18.35   |
| General farm overhead               | \$56.37    | \$55.30    | \$54.76    | \$49.08    | \$47.33    | \$46.44    | \$45.55  | \$44.06  | \$42.88  | \$37.20  | \$35.35   | \$34.83   |
| <b>Net value of production</b>      | \$143.33   | \$292.77   | \$543.75   | \$491.38   | \$294.37   | \$172.83   | \$147.98 | \$146.97 | -\$46.53 | -\$75.29 | -\$121.57 | -\$144.79 |
| Yield (Tonne/ha)                    | 296        | 282        | 302        | 309        | 322        | 282        | 249      | 289      | 309      | 289      | 255       | 202       |
| Price (\$/Tonne)                    | \$30.60    | \$35.47    | \$38.27    | \$33.84    | \$26.52    | \$26.93    | \$28.29  | \$21.81  | \$14.91  | \$15.56  | \$15.20   | \$17.68   |

Table S4. Economic analysis bioenergy crop production over 12-year period in USD per hectare

| Year    | Corn      | Corn-stover | Sorghum   | Soybean    | Corn-soybean | Corn-soybean-canola | Corn-stover-soybean | Miscanthus  | Switchgrass  | Sorghum-soybean |
|---------|-----------|-------------|-----------|------------|--------------|---------------------|---------------------|-------------|--------------|-----------------|
| 2003    | -\$161.53 | -\$144.37   | -\$118.51 | -\$144.79  | -\$161.53    | -\$161.53           | -\$144.37           | -\$3,691.95 | -\$1,212.69  | -\$118.51       |
| 2004    | -\$169.39 | -\$152.23   | -\$189.75 | -\$121.57  | -\$121.57    | -\$121.57           | -\$121.57           | -\$912.45   | -\$762.35    | -\$121.57       |
| 2005    | -\$343.05 | -\$325.89   | -\$249.64 | -\$343.05  | -\$343.05    | -\$1,150.94         | -\$325.89           | -\$126.72   | -\$779.00    | -\$249.64       |
| 2006    | -\$386.80 | -\$369.64   | -\$207.80 | -\$46.53   | -\$46.53     | -\$386.80           | -\$46.53            | -\$126.72   | -\$779.00    | -\$46.53        |
| 2007    | -\$269.40 | -\$252.24   | -\$17.96  | \$146.97   | -\$269.40    | \$146.97            | -\$252.24           | -\$126.72   | -\$779.00    | -\$17.96        |
| 2008    | \$147.98  | \$147.98    | \$147.98  | -\$182.68  | \$147.98     | -\$654.47           | \$147.98            | -\$126.72   | -\$779.00    | \$147.98        |
| 2009    | -\$316.43 | -\$299.27   | -\$174.73 | \$172.83   | -\$316.43    | -\$316.43           | -\$299.27           | -\$126.72   | -\$779.00    | -\$174.73       |
| 2010    | \$436.37  | \$453.54    | -\$35.96  | \$294.37   | \$294.37     | \$294.37            | \$294.37            | -\$126.72   | -\$852.00    | \$294.37        |
| 2011    | \$711.73  | \$728.90    | \$234.85  | \$711.73   | \$711.73     | -\$651.32           | \$728.90            | -\$126.72   | -\$852.00    | \$234.85        |
| 2012    | \$658.28  | \$669.94    | -\$187.60 | \$543.75   | \$543.75     | \$658.28            | \$543.75            | -\$126.72   | -\$852.00    | \$543.75        |
| 2013    | \$105.10  | \$122.27    | -\$46.09  | \$292.77   | \$105.10     | \$292.77            | \$122.27            | -\$126.72   | -\$924.29    | -\$46.09        |
| 2014    | \$143.33  | \$143.33    | \$143.33  | -\$193.43  | \$143.33     | -\$474.65           | \$143.33            | -\$126.72   | -\$924.29    | \$143.33        |
| Total   | \$556.19  | \$722.33    | -\$701.88 | \$1,130.35 | \$687.74     | -\$2,525.33         | \$790.72            | -\$5,871.65 | -\$10,274.62 | \$589.24        |
| Average | \$46.35   | \$60.19     | -\$58.49  | \$94.20    | \$57.31      | -\$210.44           | \$65.89             | -\$489.30   | -\$856.22    | \$49.10         |

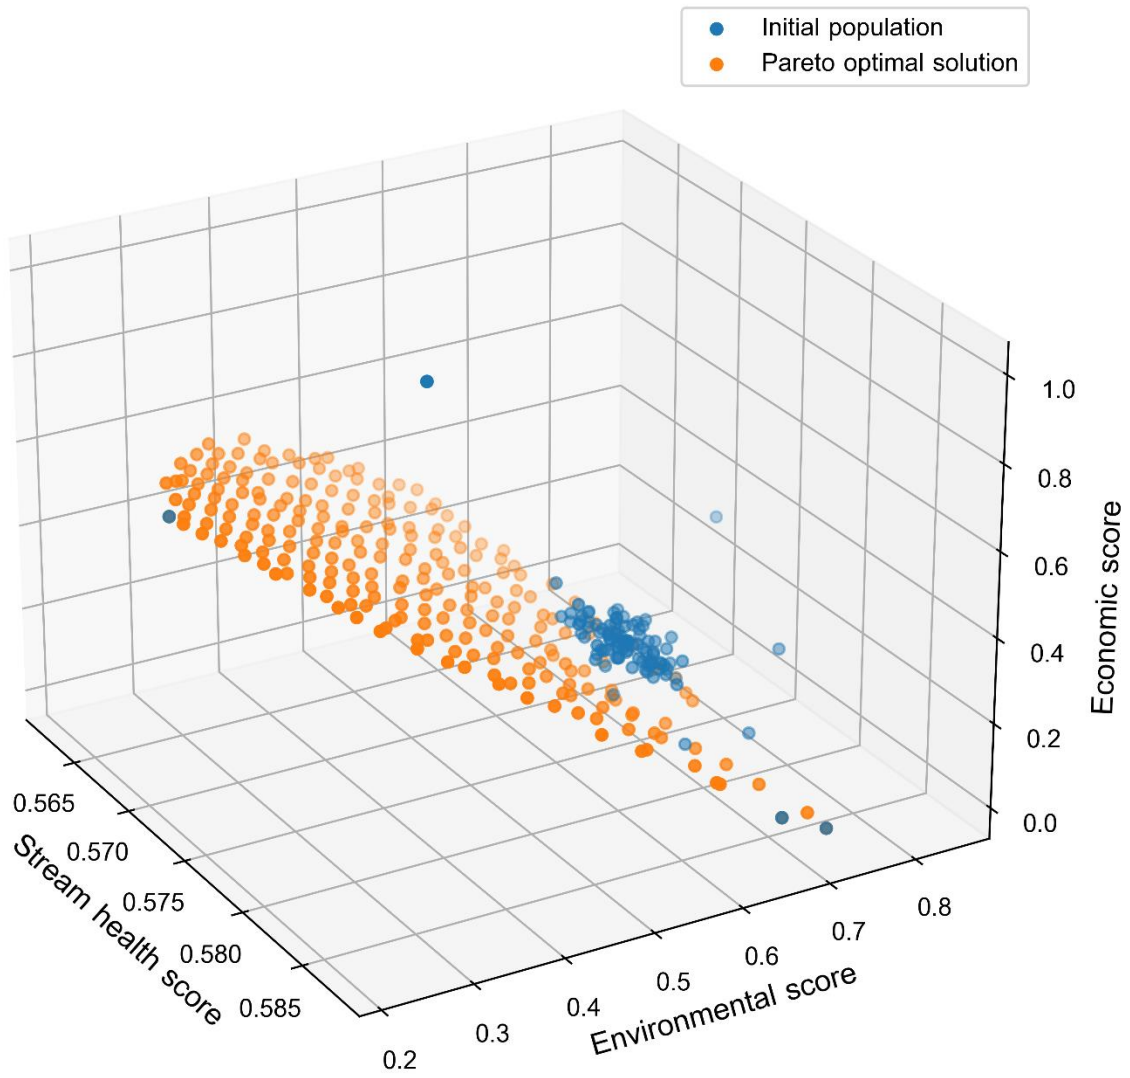

Figure S1. Initial population and Pareto optimal solutions front
